# Supplementary material for: Integrative Taxonomy of Two Peruvian Strains of Brachionus plicatilis Complex with Potential in Aquaculture
Source: MDPI journal article supplement (doi:10.3390/d13120671), 2021-12-15
Supplement: s1 [file s1]

# Integrative Taxonomy of Two Peruvian Strains of *Brachionus plicatilis* Complex with Potential in Aquaculture

Pedro Pablo Alonso Sánchez-Dávila<sup>1\*</sup>, Giovanna Sotil<sup>2</sup>, Araceli Adabache-Ortiz<sup>3</sup>, Deivis Cueva<sup>2</sup> and Marcelo Silva-Briano<sup>3</sup>

<sup>1</sup> Instituto del Mar del Perú - IMARPE, DGIA, AFIA, BGOA, Esquina Gamarra y Gral. Valle s/n, Callao, Peru.  
<sup>2</sup> Instituto del Mar del Perú - IMARPE, DGIA, Laboratorio de Genética Molecular, Esquina Gamarra y Gral. Valle s/n, Callao, Peru.  
<sup>3</sup> Universidad Autónoma de Aguascalientes. Centro de Ciencias Básicas. Edificio 202. Laboratorio No. 1, de Ecología. Departamento de Biología. México.  
\* Correspondence: psanchez@imarpe.gob.pe

## Supplementary Materials

**Table S1.** List of GenBank accession numbers for COI and ITS1 sequences obtained in this study, from organisms of strains isolated from Peru.

| Collection site    | Strain code    | Number of organisms | Sex     | GenBank accession number |          |
|--------------------|----------------|---------------------|---------|--------------------------|----------|
|                    |                |                     |         | COI                      | ITS1     |
| Santo Domingo, Ica | IMP-BG-Z018-SD | 1                   | Female  | MK534737                 | MZ569584 |
|                    |                | 1                   | Female  | MZ662909                 | MZ695037 |
|                    |                | 1                   | Male    | MZ662910                 | -        |
|                    |                | 1                   | Female  | -                        | MZ695038 |
|                    |                | 2                   | Females | MZ662911                 | MZ695039 |
|                    |                | 2                   | Females | MZ662912                 | MZ695040 |
|                    |                | 3                   | Females | MZ662913                 | MZ695041 |
|                    |                | 3                   | Females | MZ662914                 | MZ695042 |
|                    |                | 10                  | Females | MZ662915                 | MZ695043 |
|                    |                | 10                  | Females | MZ662916                 | MZ695044 |
| Ventanilla, Callao | IMP-BG-Z010-VL | 1                   | Female  | MK534738                 | MZ569507 |
|                    |                | 1                   | Female  | MZ662901                 | MZ695046 |
|                    |                | 1                   | Male    | MZ662902                 | -        |
|                    |                | 1                   | Female  | -                        | MZ695047 |
|                    |                | 2                   | Females | MZ662903                 | MZ695048 |
|                    |                | 2                   | Females | MZ662904                 | MZ695049 |
|                    |                | 3                   | Females | MZ662905                 | MZ695050 |
|                    |                | 3                   | Females | MZ662906                 | MZ695051 |
|                    |                | 10                  | Females | MZ662907                 | MZ695052 |
|                    |                | 10                  | Females | MZ662908                 | MZ695053 |

**Table S2.** Measures from parthenogenetic females of the strains IMP-BG Z010-VL and Z018-SD.

|                       | Lorica length<br>(a) |        | Distance<br>between lateral<br>spines<br>(b) |        | Lorica width<br>(c) |        | Distance<br>between<br>central<br>spines (d) |       | Dorsal sinus<br>depth<br>(e) |       | Eggs length |        | Eggs width |       |
|-----------------------|----------------------|--------|----------------------------------------------|--------|---------------------|--------|----------------------------------------------|-------|------------------------------|-------|-------------|--------|------------|-------|
|                       | VL                   | SD     | VL                                           | SD     | VL                  | SD     | VL                                           | SD    | VL                           | SD    | VL          | SD     | VL         | SD    |
|                       | n=120                | n=125  | n=120                                        | n=125  | n=120               | n=125  | n=48                                         | n=125 | n=48                         | n=125 | n=48        | n=75   | n=48       | n=75  |
| Mean                  | 248.65               | 186.21 | 131.53                                       | 95.88  | 190.31              | 144.97 | 26.18                                        | 19.45 | 23.86                        | 19.39 | 146.61      | 100.07 | 94.88      | 86.74 |
| Minimum               | 194.08               | 145.30 | 80.49                                        | 63.89  | 130.54              | 96.28  | 13.06                                        | 10.24 | 15.02                        | 13.22 | 102.53      | 81.57  | 61.13      | 61.69 |
| Maximum               | 295.16               | 226.87 | 156.78                                       | 127.78 | 238.68              | 189.49 | 37.91                                        | 27.39 | 32.19                        | 26.80 | 175.59      | 121.72 | 145.67     | 98.62 |
| Standard<br>Deviation | 16.18                | 17.41  | 12.03                                        | 16.48  | 21.04               | 20.48  | 5.39                                         | 3.08  | 3.34                         | 2.99  | 18.04       | 7.47   | 21.74      | 8.20  |

**Table S3.** Measures from parthenogenetic females of the strains IMP-BG Z010-VL and Z018-SD used for statistical comparison (n=60).

|                    | Lorica length |       | Distance between lateral spines |       | Lorica width |       | Distance between central spines |      | Dorsal sinus depth |      | Distance between central and medial spines |      | Medial spine length |      | Head aperture |      | Lateral spine length |       |
|--------------------|---------------|-------|---------------------------------|-------|--------------|-------|---------------------------------|------|--------------------|------|--------------------------------------------|------|---------------------|------|---------------|------|----------------------|-------|
|                    | (a)           |       | (b)                             |       | (c)          |       | (d)                             |      | (e)                |      | (f)                                        |      | (g)                 |      | (h)           |      | (i)                  |       |
|                    | VL            | SD    | VL                              | SD    | VL           | SD    | VL                              | SD   | VL                 | SD   | VL                                         | SD   | VL                  | SD   | VL            | SD   | VL                   | SD    |
| Mean               | 251.1         | 193.3 | 124.3                           | 88.13 | 184.3        | 141.7 | 24.0                            | 16.0 | 19.6               | 20.1 | 27.2                                       | 20.9 | 11.8                | 10.2 | 12.7          | 12.2 | 139.5                | 96.23 |
|                    | 7             | 6     | 6                               |       | 6            | 8     | 3                               | 3    | 9                  | 0    | 7                                          | 1    | 4                   | 0    | 0             | 6    | 9                    |       |
| Minimum            | 235.0         | 180.4 | 105.1                           | 72.76 | 157.3        | 101.7 | 18.8                            | 10.2 | 14.6               | 13.6 | 21.3                                       | 13.9 | 9.28                | 6.05 | 8.31          | 7.09 | 121.0                | 84.03 |
|                    | 3             | 0     | 9                               |       | 3            | 3     | 5                               | 4    | 9                  | 5    | 0                                          | 5    |                     |      |               |      | 2                    |       |
| Maximum            | 273.7         | 241.6 | 140.5                           | 109.8 | 211.1        | 184.9 | 31.1                            | 21.2 | 28.6               | 25.8 | 37.4                                       | 25.9 | 14.7                | 14.4 | 16.4          | 16.4 | 163.4                | 118.5 |
|                    | 5             | 3     | 2                               | 2     | 2            | 8     | 0                               | 3    | 8                  | 1    | 8                                          | 6    | 9                   | 7    | 6             | 1    | 2                    | 5     |
| Standard Deviation | 9.92          | 10.62 | 7.56                            | 7.49  | 10.96        | 12.92 | 2.71                            | 2.32 | 3.23               | 2.53 | 3.31                                       | 2.40 | 1.46                | 1.76 | 1.85          | 1.90 | 9.17                 | 8.00  |

**Table S4.** Measures from parthenogenetic females of the reference strains L (*B. plicatilis* s.s.) and SS (*B. rotundiformis*) used for statistical comparison (n=60).

|                       | Lorica length<br>(a) |       | Distance<br>between<br>lateral spines<br>(b) |       | Lorica width<br>(c) |       | Distance<br>between<br>central<br>spines<br>(d) |      | Dorsal<br>sinus<br>depth<br>(e) |      | Distance<br>between<br>central and<br>medial<br>spines (f) |      | Medial<br>spine<br>length<br>(g) |      | Head<br>aperture<br>(h) |      | Lateral spine<br>length<br>(i) |       |
|-----------------------|----------------------|-------|----------------------------------------------|-------|---------------------|-------|-------------------------------------------------|------|---------------------------------|------|------------------------------------------------------------|------|----------------------------------|------|-------------------------|------|--------------------------------|-------|
|                       | L                    | SS    | L                                            | SS    | L                   | SS    | L                                               | SS   | L                               | SS   | L                                                          | SS   | L                                | SS   | L                       | SS   | L                              | SS    |
| Mean                  | 263.1                | 147.8 | 115.4                                        | 82.49 | 174.6               | 116.8 | 27.8                                            | 16.5 | 26.6                            | 18.9 | 26.6                                                       | 18.6 | 15.1                             | 13.5 | 15.5                    | 14.9 | 126.5                          | 81.80 |
|                       | 4                    | 0     | 8                                            |       | 2                   | 8     | 0                                               | 7    | 1                               | 7    | 0                                                          | 3    | 3                                | 8    | 8                       | 9    | 7                              |       |
| Minimum               | 248.3                | 130.5 | 88.92                                        | 18.56 | 149.9               | 88.74 | 19.8                                            | 10.1 | 21.4                            | 11.2 | 18.9                                                       | 14.1 | 10.0                             | 9.25 | 11.4                    | 10.2 | 105.8                          | 61.81 |
|                       | 4                    | 1     |                                              |       | 5                   |       | 7                                               | 8    | 3                               | 6    | 8                                                          | 7    | 7                                |      | 7                       | 2    | 8                              |       |
| Maximum               | 296.8                | 170.9 | 140.8                                        | 105.0 | 200.8               | 141.3 | 36.4                                            | 29.5 | 34.0                            | 25.4 | 32.8                                                       | 23.8 | 18.8                             | 19.2 | 19.2                    | 22.7 | 151.0                          | 102.5 |
|                       | 6                    | 7     | 0                                            | 1     | 5                   | 8     | 6                                               | 3    | 0                               | 7    | 3                                                          | 0    | 8                                | 5    | 1                       | 3    | 9                              | 4     |
| Standard<br>Deviation | 10.86                | 9.88  | 11.52                                        | 13.11 | 11.56               | 10.82 | 3.76                                            | 3.02 | 2.44                            | 3.26 | 2.65                                                       | 2.46 | 1.76                             | 2.37 | 1.88                    | 2.5  | 11.06                          | 10.01 |

**Table S5.** Record of production parameter of both parthenogenetic females of the strains IMP-BG Z010-VL and Z018-SD. Min = minimum, Max = maximum, SD = Standard deviation. The units of each parameter are indicated in parenthesis. Data obtained from the F1 with less than 24 hours after hatching. (n=48).

| Production parameters         | Strain IMP-BG Z010-VL |     |     |     |        | Strain IMP-BG Z018-SD |     |     |     |        |
|-------------------------------|-----------------------|-----|-----|-----|--------|-----------------------|-----|-----|-----|--------|
|                               | Mean                  | SD  | Min | Max | Median | Mean                  | SD  | Min | Max | Median |
| Longevity (days)              | 19.2                  | 3.9 | 29  | 12  | 18.5   | 14.4                  | 3.9 | 23  | 7   | 13     |
| Progeny (number of offspring) | 15.5                  | 6.6 | 31  | 0   | 15     | 7.8                   | 3.9 | 16  | 0   | 7      |
| Production (number of eggs)   | 18                    | 5.7 | 31  | 7   | 17     | 9                     | 4.2 | 19  | 2   | 8      |
| Maximum load (number of eggs) | 2.5                   | 0.9 | 6   | 1   | 2      | 1.6                   | 0.6 | 3   | 1   | 2      |
| Pre-reproductive Age (days)   | 4.4                   | 1   | 7   | 3   | 5      | 4.5                   | 2.8 | 10  | 2   | 3.5    |
| Reproductive Age (days)       | 12                    | 4.6 | 22  | 0   | 12     | 8                     | 3.2 | 17  | 2   | 8      |
| Post-reproductive Age (days)  | 2.5                   | 2   | 11  | 0   | 2      | 1.9                   | 1   | 5   | 0   | 2      |

**Table S6.** Nucleotide composition registered in mtDNA COI sequences (570 bp) of L4 and SM2 organisms from different origins, considered for phylogenetic analysis.

| Morphotype | Locality       | Number of samples | Nucleotide composition (%) |       |       |       |
|------------|----------------|-------------------|----------------------------|-------|-------|-------|
|            |                |                   | T                          | C     | A     | G     |
| L4         | Peru           | 9                 | 38.40                      | 19.50 | 25.10 | 17.00 |
|            | Chile          | 27                | 38.57                      | 19.24 | 24.99 | 17.19 |
|            | Mexico         | 6                 | 41.22                      | 16.82 | 23.52 | 18.38 |
|            | USA            | 7                 | 41.06                      | 17.21 | 23.67 | 18.10 |
|            | China          | 1                 | 41.60                      | 16.50 | 23.50 | 18.40 |
|            | Japan          | 5                 | 40.40                      | 18.10 | 23.90 | 17.70 |
|            | Australia      | 1                 | 40.40                      | 18.10 | 23.90 | 17.70 |
|            | France         | 5                 | 40.74                      | 17.52 | 23.84 | 17.88 |
| SM2        | Peru           | 9                 | 45.40                      | 15.60 | 20.70 | 18.20 |
|            | USA            | 7                 | 46.09                      | 15.30 | 21.84 | 16.79 |
|            | Spain          | 3                 | 46.10                      | 15.37 | 21.20 | 17.27 |
|            | Cayman Islands | 3                 | 46.00                      | 15.40 | 21.80 | 16.80 |
|            | Philippines    | 1                 | 46.00                      | 15.30 | 21.80 | 17.00 |
|            | South Korea    | 5                 | 44.80                      | 15.78 | 21.38 | 18.08 |
|            | Turkey         | 1                 | 43.30                      | 16.30 | 21.60 | 18.80 |
|            | Italy          | 1                 | 43.00                      | 17.00 | 20.70 | 19.30 |

**Table S7.** Nucleotide composition registered in rDNA ITS1 sequences (331 bp) of L4 and SM2 organisms from different origins, considered for phylogenetic analysis.

| Morphotype | Locality       | Number of samples | Nucleotide composition (%) |       |       |       |
|------------|----------------|-------------------|----------------------------|-------|-------|-------|
|            |                |                   | T                          | C     | A     | G     |
| L4         | Peru           | 9                 | 38.40                      | 15.90 | 31.40 | 14.30 |
|            | Chile          | 23                | 38.49                      | 15.90 | 31.27 | 14.30 |
|            | Mexico         | 4                 | 38.40                      | 15.90 | 31.40 | 14.30 |
|            | USA            | 3                 | 38.40                      | 15.90 | 31.40 | 14.30 |
|            | Japan          | 4                 | 38.40                      | 15.90 | 31.40 | 14.30 |
|            | Australia      | 1                 | 38.40                      | 15.90 | 31.40 | 14.30 |
| SM2        | Peru           | 9                 | 40.10                      | 13.70 | 32.50 | 13.70 |
|            | Spain          | 2                 | 39.80                      | 13.90 | 32.60 | 13.70 |
|            | Cayman Islands | 3                 | 39.80                      | 13.70 | 32.80 | 13.70 |
|            | Philippines    | 1                 | 40.10                      | 13.70 | 32.50 | 13.70 |
|            | South Korea    | 5                 | 40.10                      | 13.70 | 32.56 | 13.64 |
|            | USA            | 7                 | 39.80                      | 13.70 | 32.80 | 13.70 |
|            | Turkey         | 1                 | 39.80                      | 13.70 | 32.80 | 13.70 |
|            | Italy          | 1                 | 40.50                      | 13.60 | 32.30 | 13.60 |

**Table S8.** Summary of the outputs of the R-Studio programme. They showed low correlation expressed by Monte-Carlo Test on the sum of eigenvalues of a co-inertia analysis (RV).

| Ventanilla Strain_L4_IMP-BG-Z010                                                                                                                                                                                                                                                                                                                                                                                                                                                                                                                                                                                                                                                                       | Santo Domingo Strain_SM2_IMP-BG-Z018                                                                                                                                                                                                                                                                                                                                                                                                                                                                                                                                                                                                                                                                           |
|--------------------------------------------------------------------------------------------------------------------------------------------------------------------------------------------------------------------------------------------------------------------------------------------------------------------------------------------------------------------------------------------------------------------------------------------------------------------------------------------------------------------------------------------------------------------------------------------------------------------------------------------------------------------------------------------------------|----------------------------------------------------------------------------------------------------------------------------------------------------------------------------------------------------------------------------------------------------------------------------------------------------------------------------------------------------------------------------------------------------------------------------------------------------------------------------------------------------------------------------------------------------------------------------------------------------------------------------------------------------------------------------------------------------------------|
| <b>Coinertia analysis</b><br><br>Class: coinertia dudi<br>Call: coinertia(dudiX = pca_production, dudiY = pca_measurement, scannf = FALSE, nf = 2)<br><br><b>Total inertia: 3.318</b><br><br>Eigenvalues:<br>Ax1  Ax2  Ax3<br>3.20013 0.09382 0.02357<br><br>Projected inertia (%):<br>Ax1  Ax2  Ax3<br>96.4613 2.8281 0.7106<br><br>Cumulative projected inertia (%):<br>Ax1  Ax1:2  Ax1:3<br>96.46  99.29  100.00<br><br>Eigenvalues decomposition:<br>eig  covar  sdX  sdY  corr<br>1 3.20012568 1.7888895 1.250093 1.728665 0.8278092<br>2 0.09382405 0.3063071 0.853485 1.273372 0.2818421<br><br>Inertia & coinertia X (pca_production):<br>inertia  max  ratio<br>1 1.562733 1.764605 0.8855994 | <b>Coinertia analysis</b><br><br>Class: coinertia dudi<br>Call: coinertia(dudiX = pca_production, dudiY = pca_measurement, scannf = FALSE, nf = 2)<br><br><b>Total inertia: 5.113</b><br><br>Eigenvalues:<br>Ax1  Ax2  Ax3<br>5.029053 0.082265 0.001413<br><br>Projected inertia (%):<br>Ax1  Ax2  Ax3<br>98.36334 1.60902 0.02765<br><br>Cumulative projected inertia (%):<br>Ax1  Ax1:2  Ax1:3<br>98.36  99.97  100.00<br><br>Eigenvalues decomposition:<br>eig  covar  sdX  sdY  corr<br>1 5.02905337 2.2425551 1.5000611 1.857256 0.8049379<br>2 0.08226479 0.2868184 0.8060476 1.163411 0.3058532<br><br>Inertia & coinertia X (pca_production):<br>inertia  max  ratio<br>1 2.250183 2.397150 0.9386910 |

|                                                                                                                                                                                                     |                                                                                                                                                                                                     |
|-----------------------------------------------------------------------------------------------------------------------------------------------------------------------------------------------------|-----------------------------------------------------------------------------------------------------------------------------------------------------------------------------------------------------|
| 12 2.291170 2.593068 0.8835748<br><br>Inertia & coinertia Y (pca_ measurement):<br>inertia max ratio<br>1 2.988282 3.184835 0.9382849<br>12 4.609759 4.898301 0.9410935<br><br><b>RV: 0.4317608</b> | 12 2.899896 2.905029 0.9982332<br><br>Inertia & coinertia Y (pca_ measurement):<br>inertia max ratio<br>1 3.449400 3.506581 0.9836934<br>12 4.802926 4.841645 0.9920029<br><br><b>RV: 0.5245938</b> |
| Total inertia: 3.318 / RV: 0.4317608                                                                                                                                                                | Total inertia: 5.113 / RV: 0.5245938                                                                                                                                                                |
